# Supplementary material for: Photophysical properties of structural isomers of homoleptic Ir-complexes derived from xylenyl-substituted N-heterocyclic carbene ligands
Source: Royal Society of Chemistry journal article supplement (doi:10.1039/c9cp00553f), 2019-01-01
Supplement: c9cp00553f1.pdf [file c9cp00553f1.pdf]

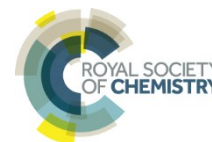

PCCP

## Electronic Supplementary Information

### Photophysical properties on structural isomers of homoleptic Ir-complexes derived from xylenyl-substituted N-heterocyclic carbene ligands

Bo-Sun Yun,<sup>a</sup> Jin-Hyoung Kim,<sup>a</sup> So-Yoen Kim,<sup>a</sup> Ho-Jin Son,<sup>\*a</sup> Dae Won Cho<sup>\*ab</sup> and Sang Ook Kang<sup>\*a</sup>

<sup>a</sup> Department of Advanced Materials Chemistry, Korea University, Sejong, 30019, South Korea

<sup>b</sup> Center for Photovoltaic Materials, Korea University, Sejong, 30019, South Korea

## Contents

### Supporting Figures

**Fig. S1** Phosphorescence emission spectra of **Ir(dmpmp)<sub>3</sub>** measured in various solvents.

**Fig. S2** Phosphorescence Emission decay profiles for **Ir(pmp)<sub>3</sub>** and **Ir(dmpmp)<sub>3</sub>** in CH<sub>2</sub>Cl<sub>2</sub> at 300 K and 2-MeTHF at 77 K.

**Fig. S3** Transient absorption spectra of **m-Ir(pmp)<sub>3</sub>**.

**Fig. S4** Frontier molecular orbitals of **f-Ir(pmp)<sub>3</sub>** and **m-Ir(pmp)<sub>3</sub>** for singlet.

**Fig. S5** Frontier molecular orbitals of **f-Ir(pmp)<sub>3</sub>** and **m-Ir(pmp)<sub>3</sub>** for the singlet and triplet manifolds.

**Table S1** For transitions related to S<sub>0</sub>→T<sub>1</sub> and S<sub>0</sub>→S<sub>1</sub>. The energies, oscillator strengths, orbital contributions, and assignments of **f-Ir(dmpmp)<sub>3</sub>** and **m-Ir(dmpmp)<sub>3</sub>** evaluated by TD-DFT calculations.

### NMR Spectra

**Fig. S6** For 2,6-dimethylphenylboronic acid.

**Fig. S7** For 2',6'-Dimethylbiphenyl-2-amine.

**Fig. S8** For N-(2',6'-dimethylbiphenyl-2-yl)-3-nitropyridin-2-amine.

**Fig. S9** For 3-(2',6'-dimethylbiphenyl-2-yl)-3H-imidazo[4,5-*b*]pyridine.

**Fig. S10** For 3-(2',6'-dimethylbiphenyl-2-yl)-1-methyl-3H-imidazo[4,5-*b*]pyridin-1-ium iodide.

**Fig. S11** For **fac-Ir(dmpmp)<sub>3</sub>**.

**Fig. S12** For **mer-Ir(dmpmp)<sub>3</sub>**.

### ESI Mass Spectra

**Fig. S13** For 2,6-dimethylphenylboronic acid.

**Fig. S14** For 2',6'-Dimethylbiphenyl-2-amine.

**Fig. S15** For N-(2',6'-dimethylbiphenyl-2-yl)-3-nitropyridin-2-amine.

**Fig. S16** For 3-(2',6'-dimethylbiphenyl-2-yl)-3H-imidazo[4,5-*b*]pyridine.

**Fig. S17** For 3-(2',6'-dimethylbiphenyl-2-yl)-1-methyl-3H-imidazo[4,5-*b*]pyridin-1-ium iodide.

**Fig. S18** For **fac-Ir(dmpmp)<sub>3</sub>**

**Fig. S19** For **mer-Ir(dmpmp)<sub>3</sub>**

**Table S2** Cartesian Coordinates of **f-Ir(dmpmp)<sub>3</sub>**, **m-Ir(dmpmp)<sub>3</sub>**, **f-Ir(pmp)<sub>3</sub>** and **m-Ir(pmp)<sub>3</sub>**

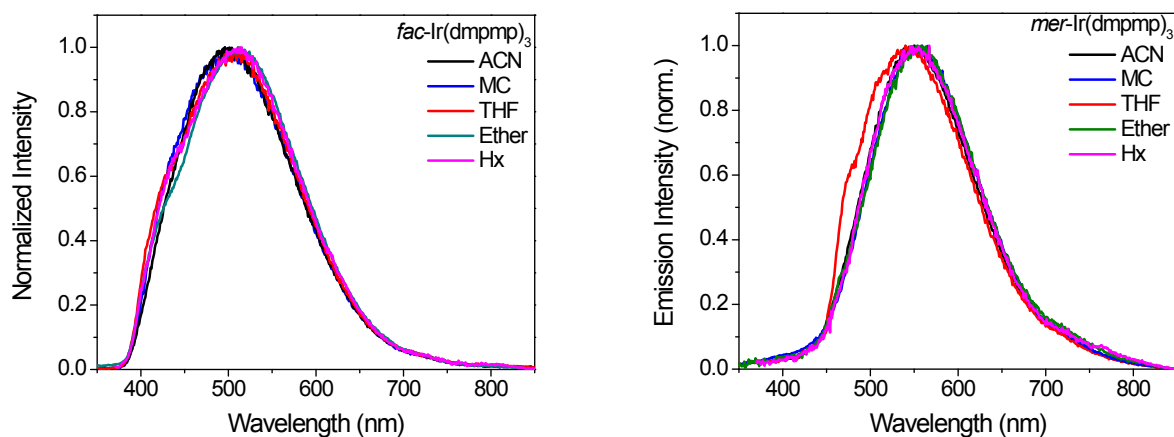

**Fig. S1** Phosphorescence emission spectra of  $\text{Ir}(\text{dmpmp})_3$  in different solvent polarities.

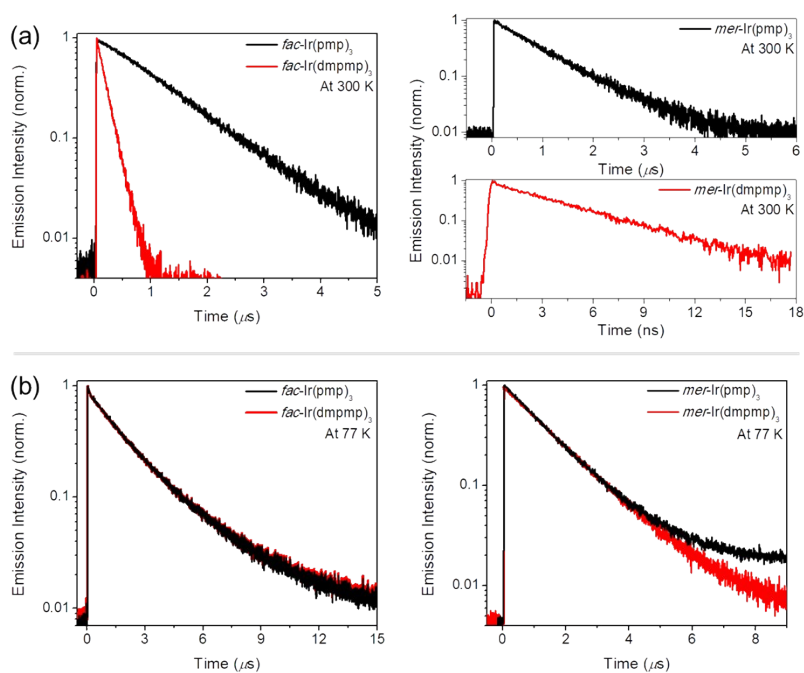

**Fig. S2** Phosphorescence emission decay profiles for  $\text{Ir}(\text{pmp})_3$  and  $\text{Ir}(\text{dmpmp})_3$  measured in (a)  $\text{CH}_2\text{Cl}_2$  at 300 K, and (b) 2-MeTHF at 77 K.

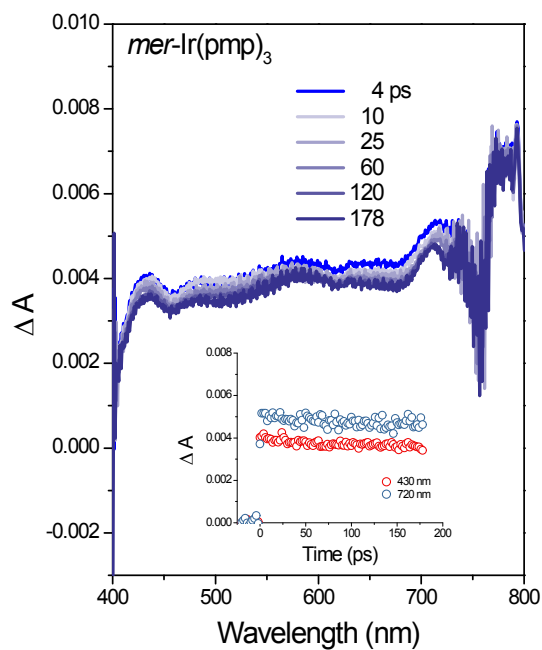

**Fig. S3** Femtosecond time-resolved transient absorption spectra of *mer-Ir(pmp)<sub>3</sub>*.

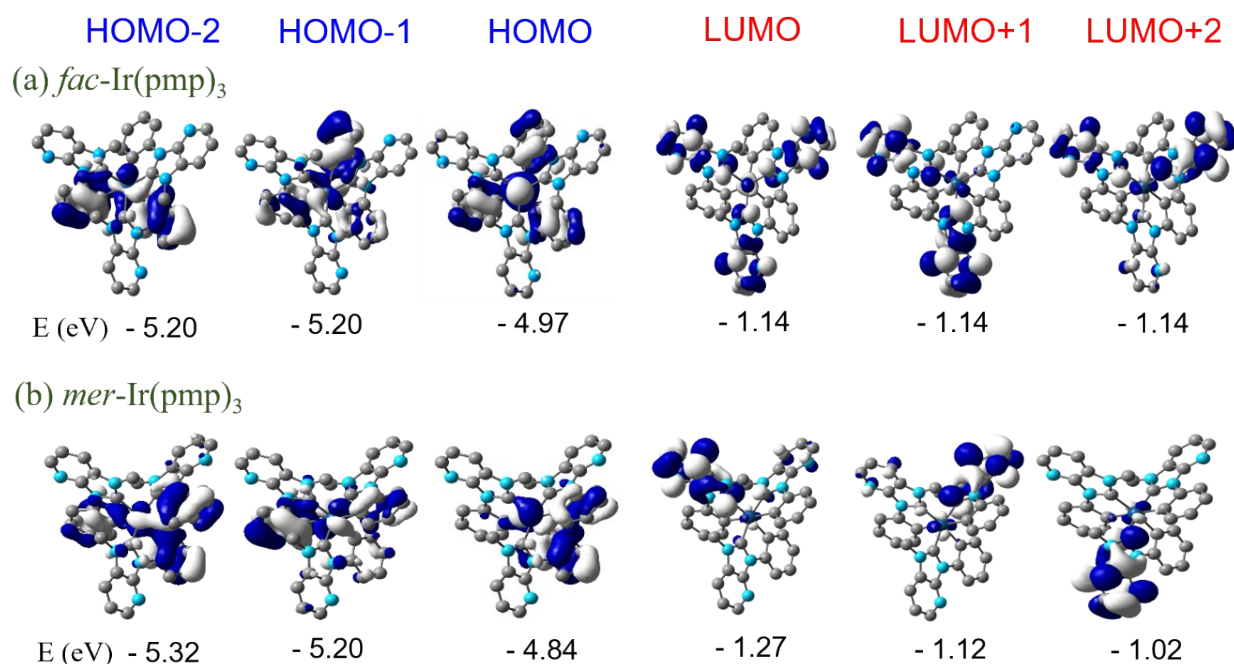

**Fig. S4** Frontier molecular orbitals of (a) *fac-Ir(pmp)<sub>3</sub>* and (b) *mer-Ir(pmp)<sub>3</sub>*.

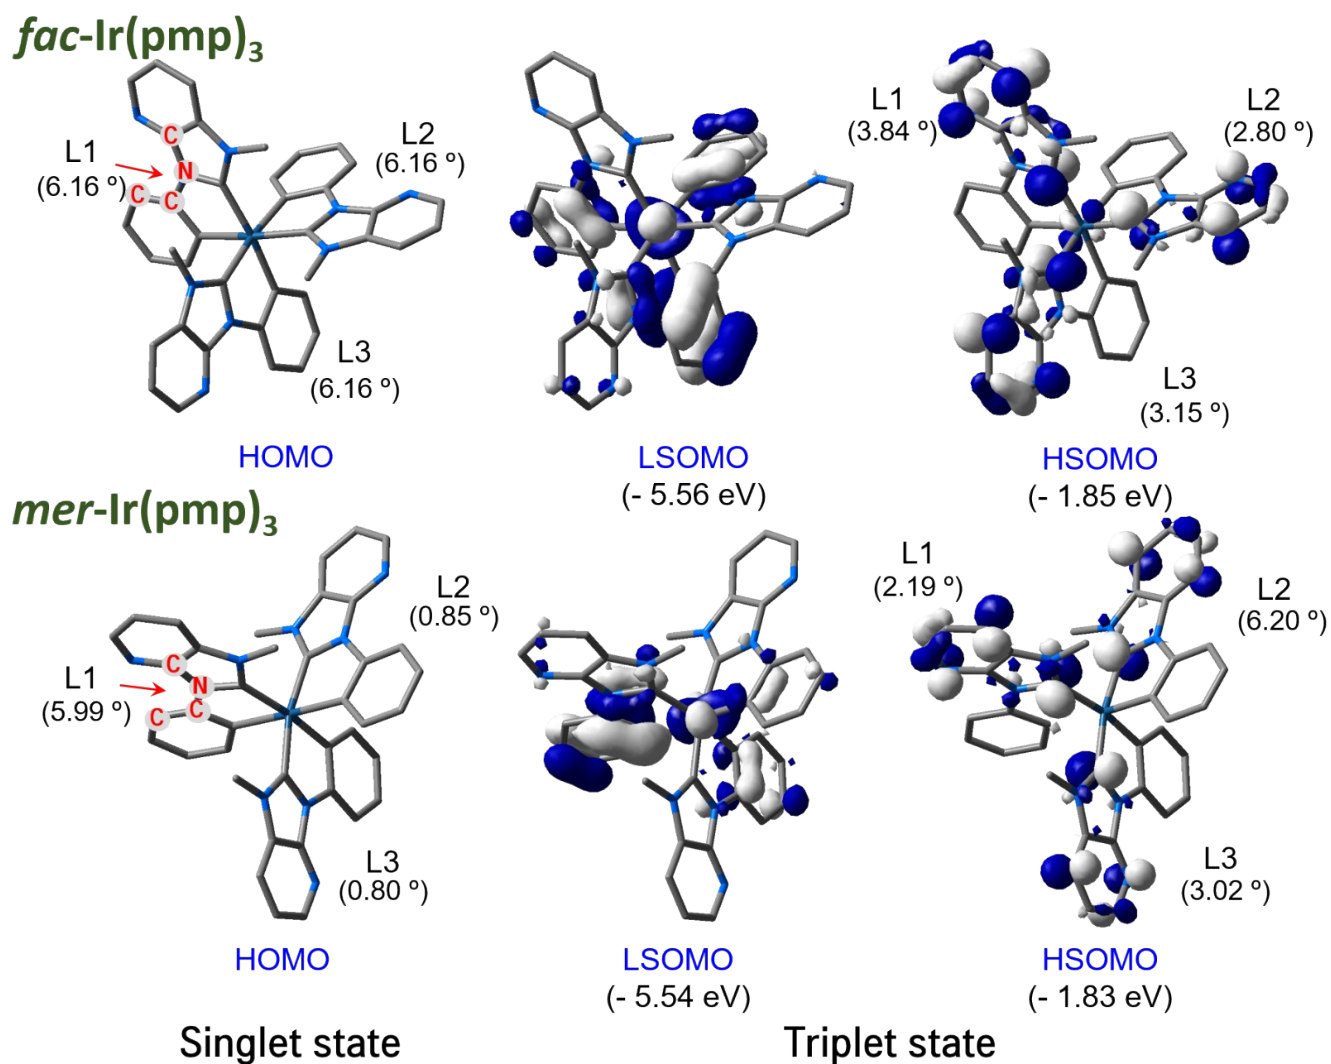

**Fig. S5** Frontier molecular orbitals of *f*-Ir(pmp)<sub>3</sub> and *m*-Ir(pmp)<sub>3</sub> for the singlet and triplet manifolds.

**Table S1** For transitions related to  $S_0 \rightarrow T_1$  and  $S_0 \rightarrow S_1$ . The energies ( $\lambda_{\text{cal}}$  and  $E_{\text{cal}}$ ), oscillator strengths ( $f$ ), orbital contributions (>10%), and assignments of ***fac*-Ir(dmpmp)<sub>3</sub>** and ***mer*-Ir(dmpmp)<sub>3</sub>** evaluated by TD-DFT calculations

|                                         | State                                                                               | $\lambda_{\text{cal}}$ ( $E_{\text{cal}}$ )                                         | $f$                                                                                  | Orbital contributions                                                                 | Assignments      |
|-----------------------------------------|-------------------------------------------------------------------------------------|-------------------------------------------------------------------------------------|--------------------------------------------------------------------------------------|---------------------------------------------------------------------------------------|------------------|
| <b><i>fac</i>-Ir(dmpmp)<sub>3</sub></b> | T1                                                                                  | 397 nm (3.12 eV)                                                                    | 0                                                                                    | H→L (73%)                                                                             | MLCT, ILCT, LLCT |
|                                         | S1                                                                                  | 372 nm (3.33 eV)                                                                    | 0.034                                                                                | H→L (75%), H→L+1 (17%)                                                                | MLCT, ILCT, LLCT |
|                                         | S2                                                                                  | 365 nm (3.40 eV)                                                                    | 0.0376                                                                               | H→L+1 (61%), H→L+2 (17%), H→L (12%)                                                   | MLCT, ILCT, LLCT |
|                                         | S3                                                                                  | 361 nm (3.43 eV)                                                                    | 0.0043                                                                               | H→L+2 (74%), H→L+1 (12%)                                                              | MLCT, ILCT, LLCT |
| <b><i>mer</i>-Ir(dmpmp)<sub>3</sub></b> | T1                                                                                  | 415 nm (2.99 eV)                                                                    | 0                                                                                    | H→L (55%), H→L+1 (32%)                                                                | MLCT, ILCT, LLCT |
|                                         | S1                                                                                  | 402 nm (3.08 eV)                                                                    | 0.0033                                                                               | H→L (80%), H→L+1 (15%)                                                                | MLCT, ILCT, LLCT |
|                                         | S2                                                                                  | 391 nm (3.17 eV)                                                                    | 0.0016                                                                               | H→L+1 (51%), H→L (16%)                                                                | MLCT, ILCT, LLCT |
|                                         | S3                                                                                  | 377 nm (3.29 eV)                                                                    | 0.0024                                                                               | H→L+2 (92%)                                                                           | MLCT, ILCT, LLCT |
| <b><i>fac</i>-Ir(dmpmp)<sub>3</sub></b> |                                                                                     |                                                                                     |                                                                                      |                                                                                       |                  |
|                                         | 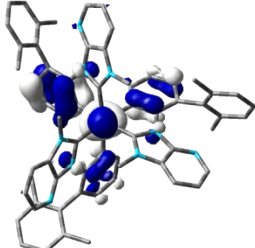  |   |   |   |                  |
|                                         | HOMO                                                                                | LUMO                                                                                | LUMO +1                                                                              | LUMO +2                                                                               |                  |
| <b><i>mer</i>-Ir(dmpmp)<sub>3</sub></b> |                                                                                     |                                                                                     |                                                                                      |                                                                                       |                  |
|                                         |  |  |  |  |                  |
|                                         | HOMO                                                                                | LUMO                                                                                | LUMO +1                                                                              | LUMO +2                                                                               |                  |

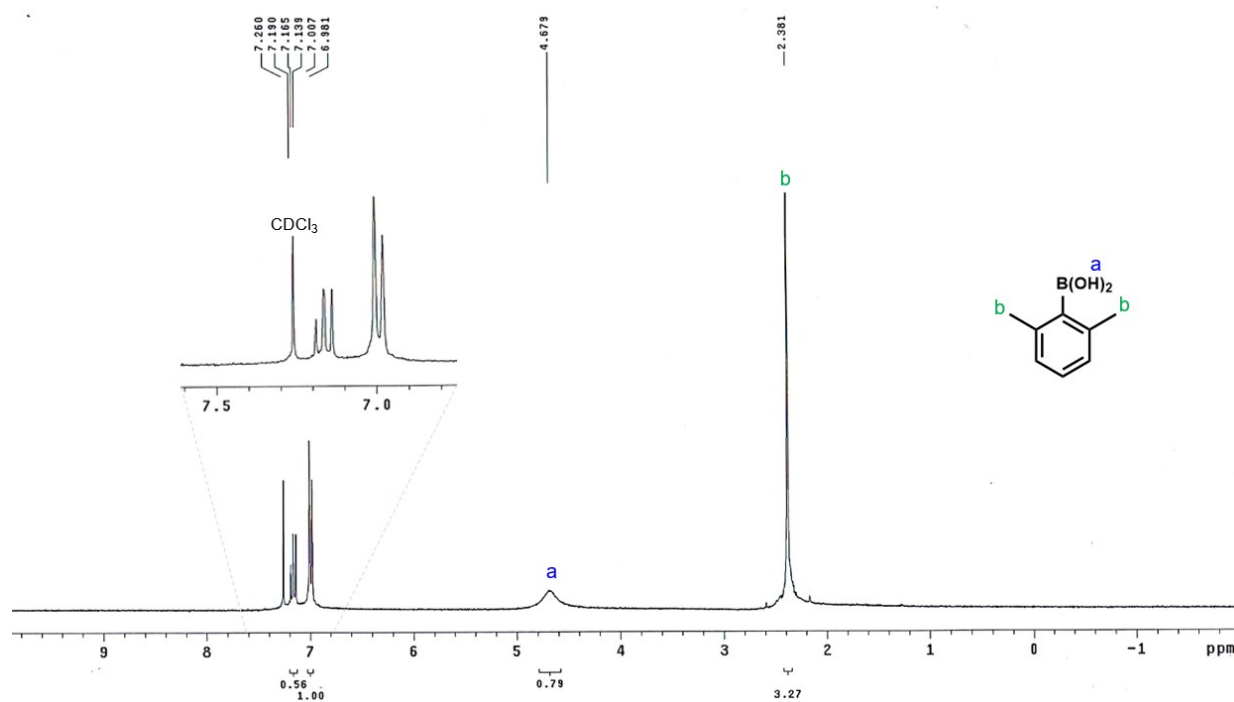

Fig. S6 <sup>1</sup>H-NMR spectrum of 2,6-dimethylphenylboronic acid.

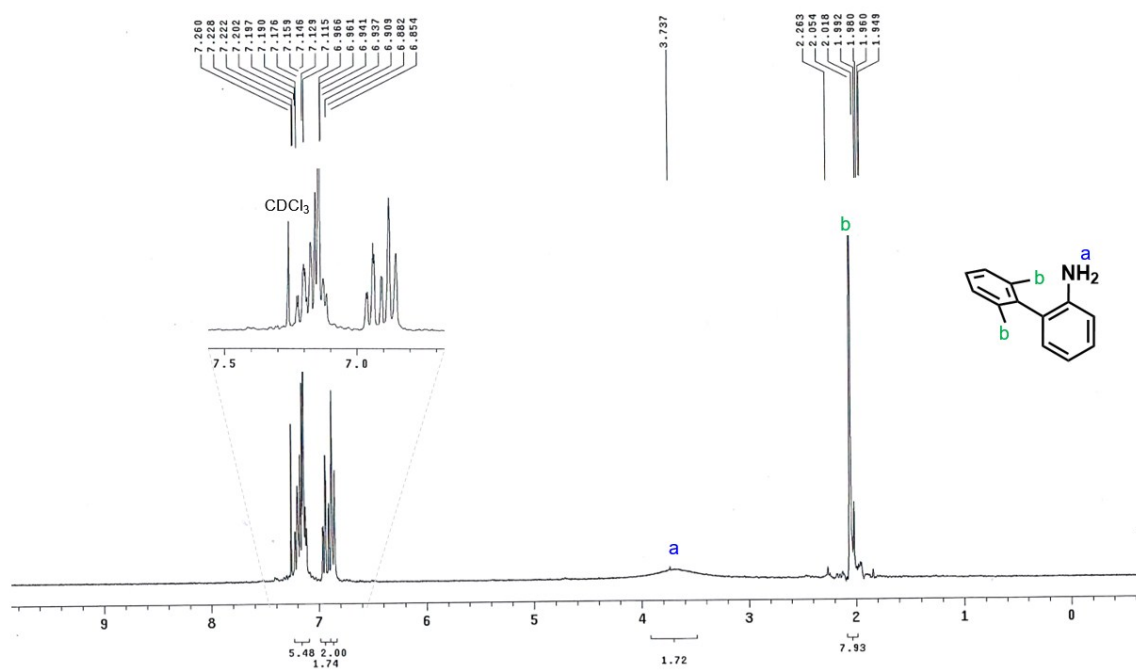

Fig. S7 <sup>1</sup>H-NMR spectrum of 2',6'-Dimethylbiphenyl-2-amine.

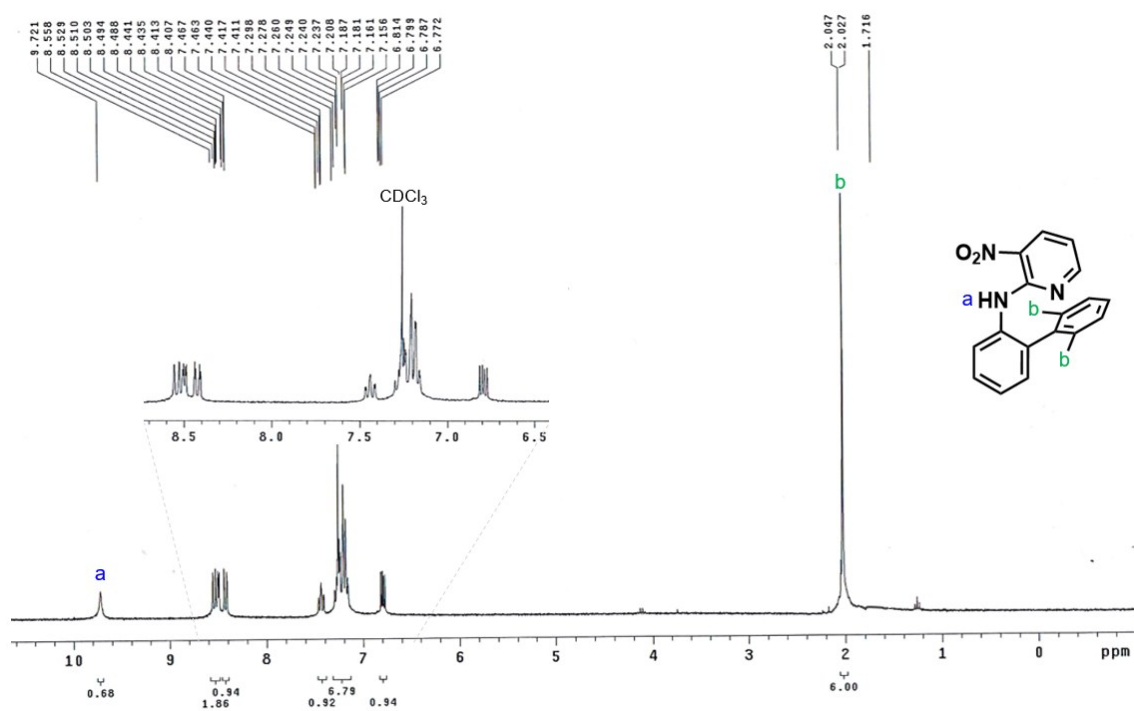

**Fig. S8** <sup>1</sup>H-NMR spectrum of *N*-(2',6'-dimethylbiphenyl-2-yl)-3-nitropyridin-2-amine.

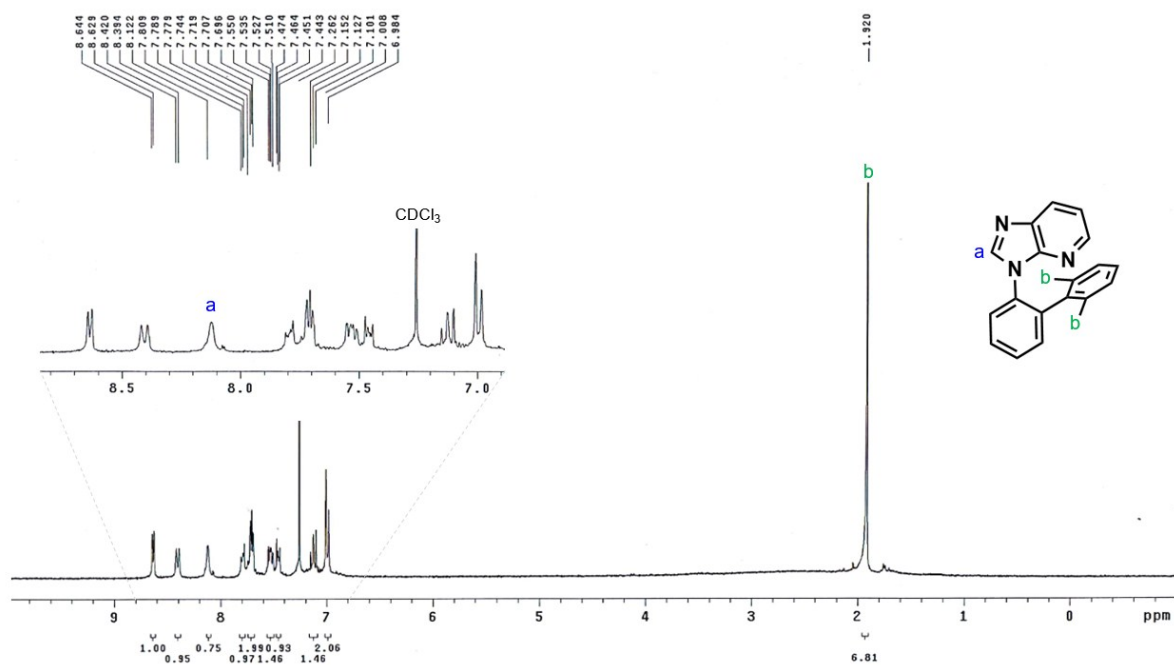

**Fig. S9** <sup>1</sup>H-NMR spectrum of 3-(2',6'-dimethylbiphenyl-2-yl)-3H-imidazo[4,5-*b*]pyridine.

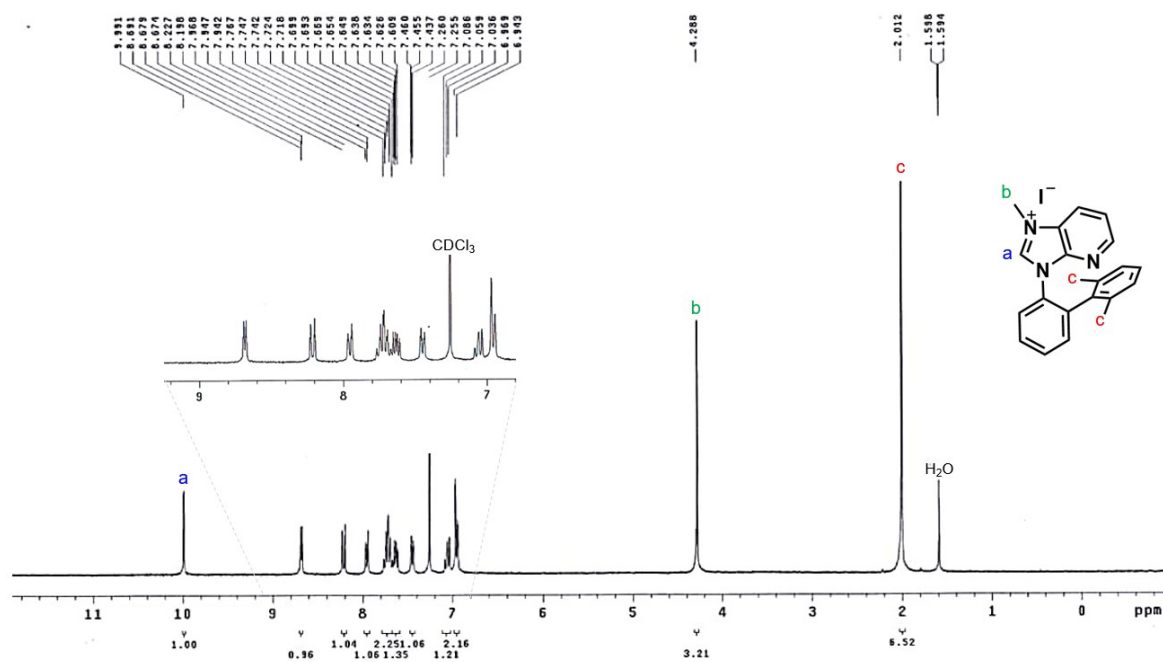

**Fig. S10**  $^1\text{H-NMR}$  spectrum of 3-(2',6'-dimethylbiphenyl-2-yl)-1-methyl-3H-imidazo[4,5-*b*]pyridin-1-ium iodide.

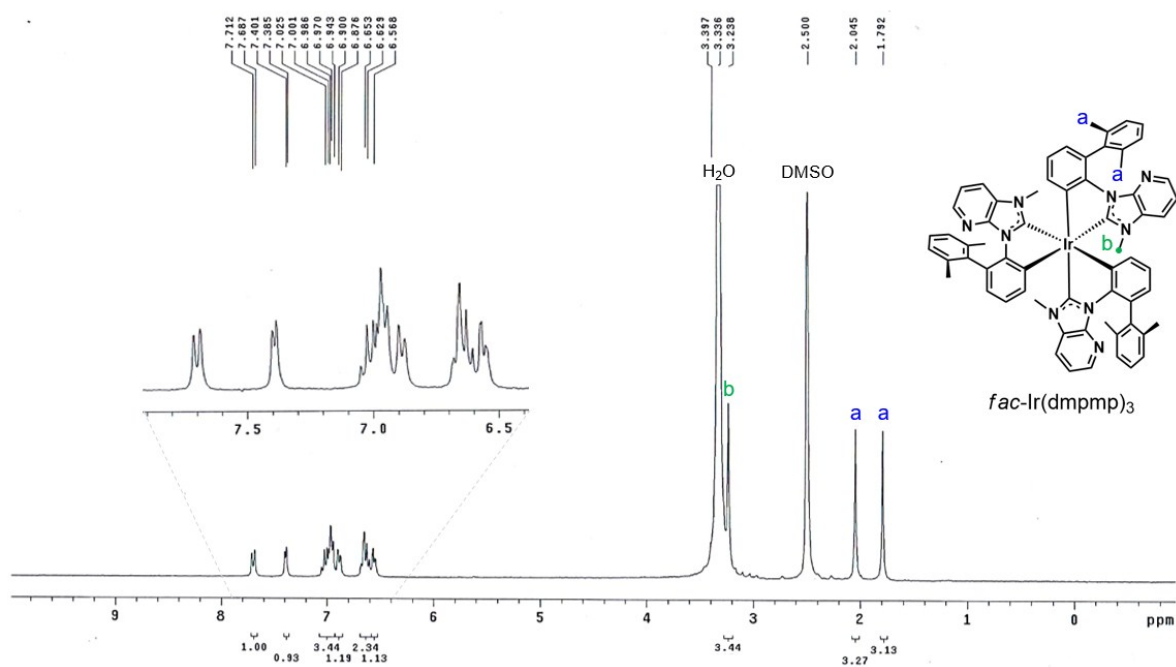

**Fig. S11**  $^1\text{H-NMR}$  spectrum of *fac*-Ir(dmpmp)<sub>3</sub>



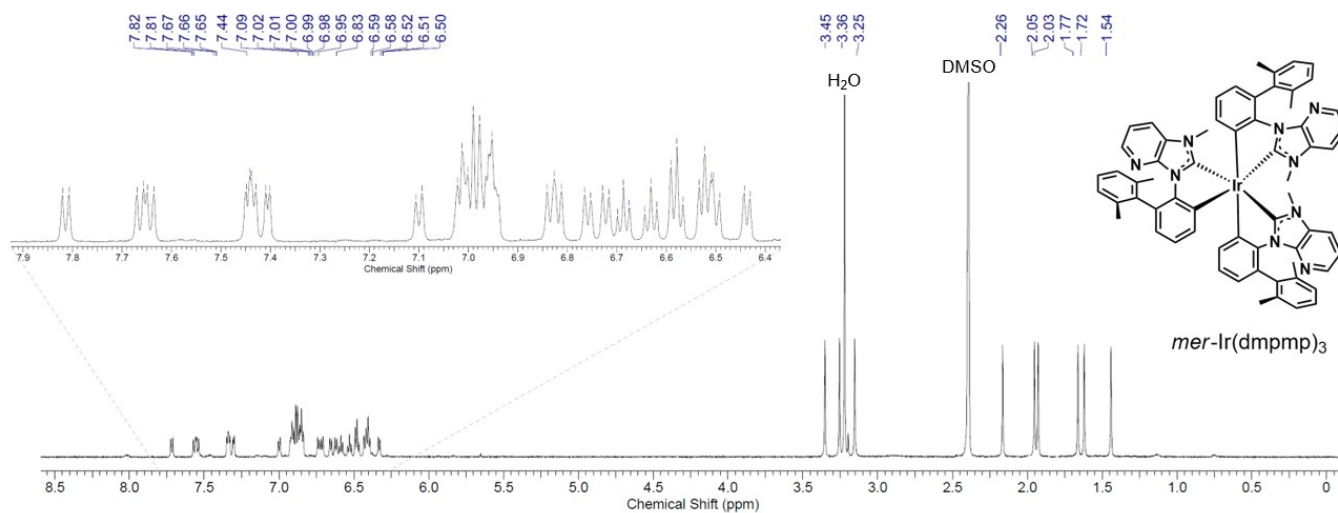

Fig. S12 <sup>1</sup>H-NMR spectrum of *mer*-Ir(dmpmp)<sub>3</sub>.

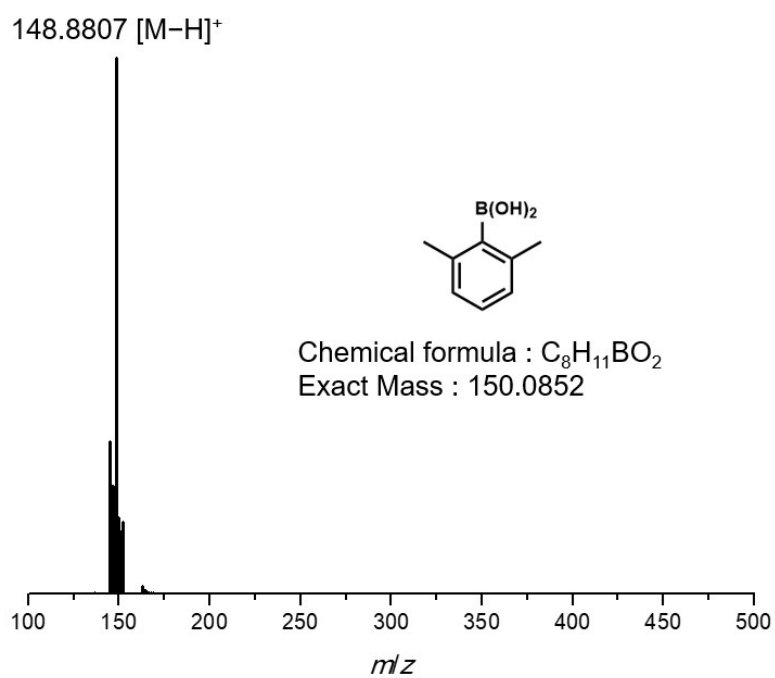

Fig. S13 ESI-Mass spectrum of 2,6-dimethylphenylboronic acid.

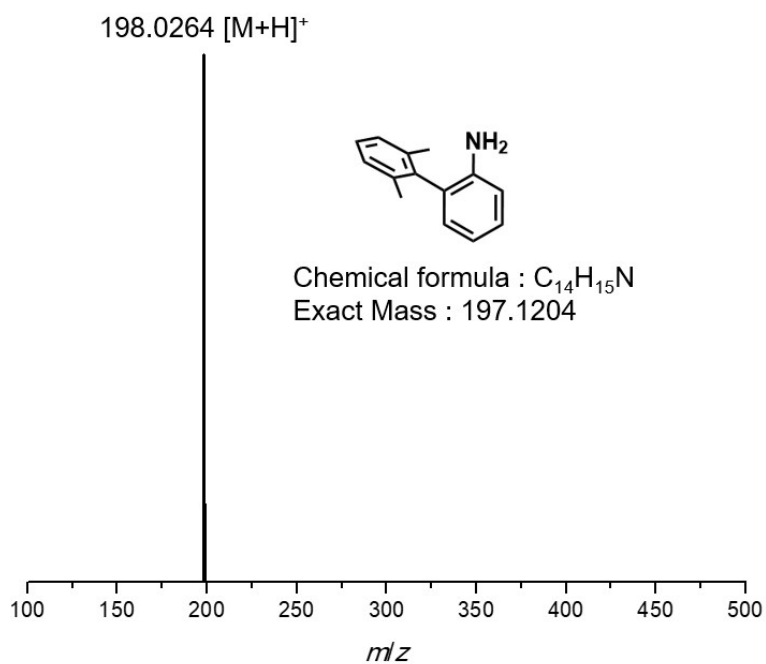

**Fig. S14** ESI-Mass spectrum of 2',6'-Dimethylbiphenyl-2-amine.

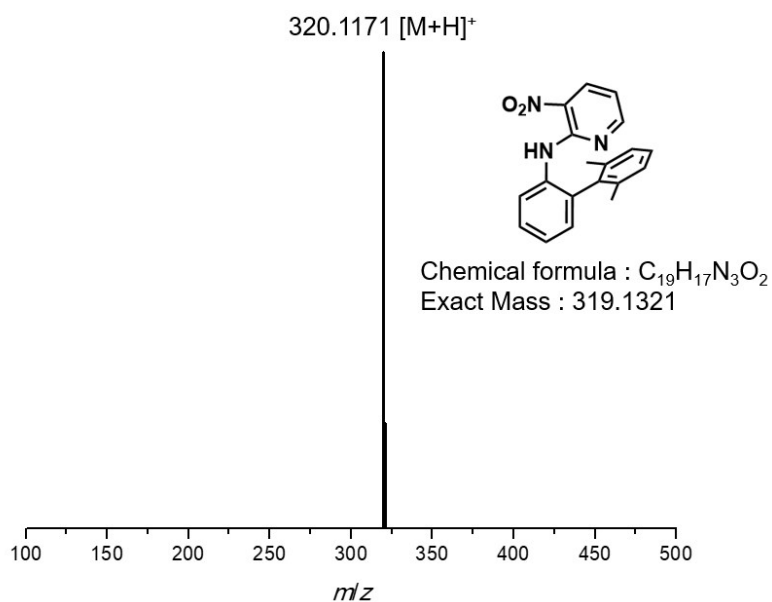

**Fig. S15** ESI-Mass spectrum of *N*-(2',6'-dimethylbiphenyl-2-yl)-3-nitropyridin-2-amine.

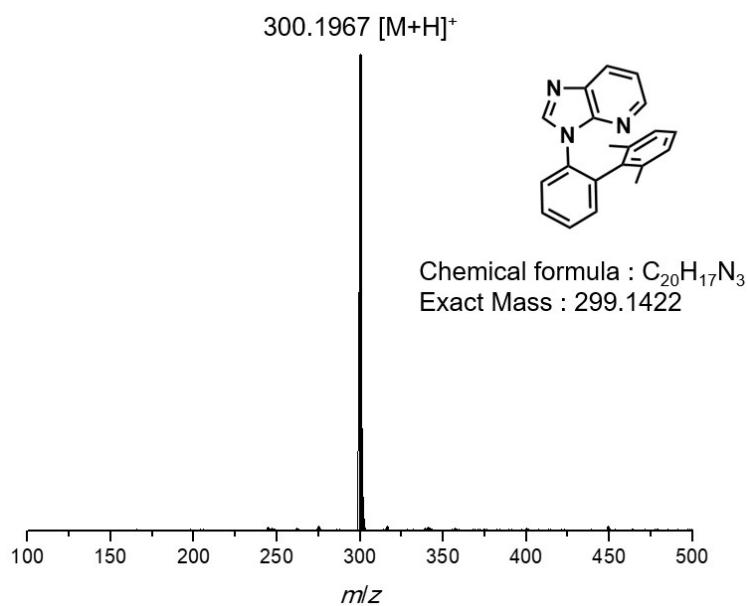

**Fig. S16** ESI-Mass spectrum of 3-(2',6'-dimethylbiphenyl-2-yl)-3H-imidazo[4,5-*b*]pyridine.

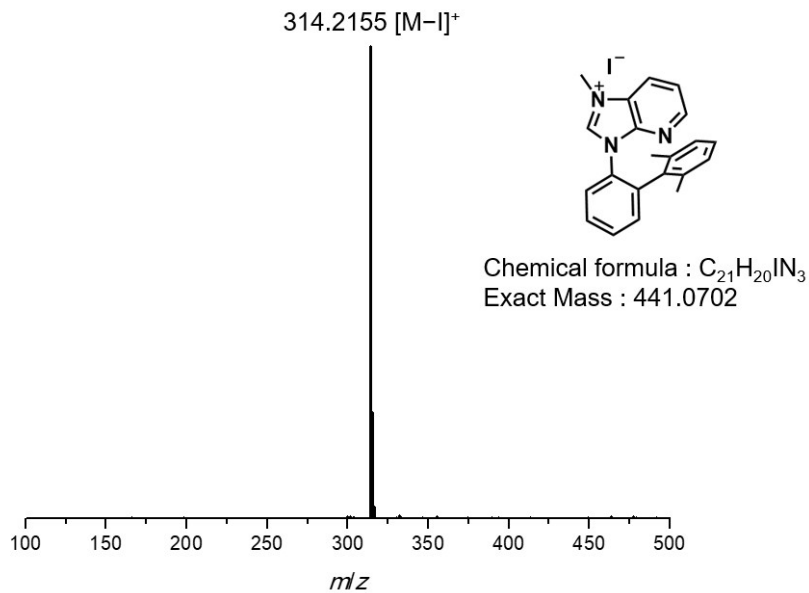

**Fig. S17** ESI-Mass spectrum of 3-(2',6'-dimethylbiphenyl-2-yl)-1-methyl-3H-imidazo[4,5-*b*]pyridin-1-ium iodide.

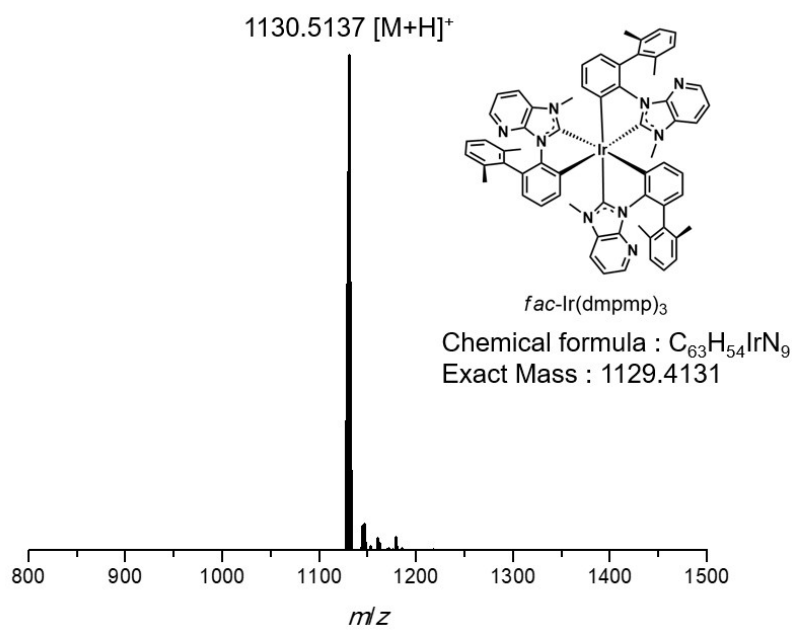

**Fig. S18** ESI-Mass spectrum of *fac*-Ir(dmpmp)<sub>3</sub>.

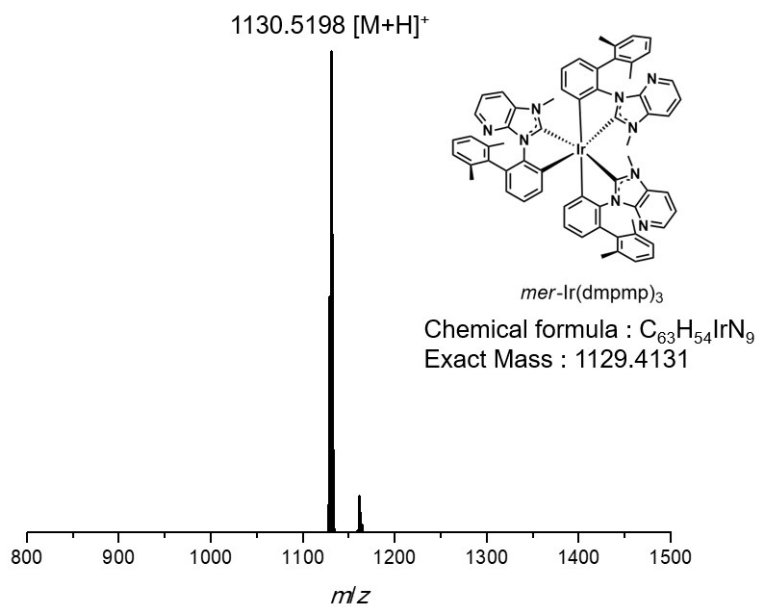

**Fig. S19** ESI-Mass spectrum of *mer*-Ir(dmpmp)<sub>3</sub>.

**Table S2** Cartesian Coordinates of *f*-Ir(dmpmp)<sub>3</sub>, *m*-Ir(dmpmp)<sub>3</sub>, *f*-Ir(pmp)<sub>3</sub> and *m*-Ir(pmp)<sub>3</sub>Optimized geometry of singlet *f*-Ir(dmpmp)<sub>3</sub>

| Symbol | X         | Y         | Z         |   |           |           |           |
|--------|-----------|-----------|-----------|---|-----------|-----------|-----------|
|        |           |           |           | H | -0.698376 | -2.106316 | -2.341763 |
|        |           |           |           | C | -2.817984 | -2.125744 | -2.669762 |
|        |           |           |           | H | -2.76957  | -2.880554 | -3.450833 |
|        |           |           |           | C | -4.161454 | -0.641815 | -1.265436 |
|        |           |           |           | C | -2.95192  | -0.169754 | -0.70668  |
|        |           |           |           | C | -1.631218 | 0.965286  | 0.955993  |
|        |           |           |           | C | -0.750765 | 2.476694  | 2.76446   |
|        |           |           |           | H | -1.218657 | 2.773865  | 3.707078  |
|        |           |           |           | H | -0.219878 | 3.335176  | 2.341277  |
|        |           |           |           | H | -0.042122 | 1.67486   | 2.95766   |
|        |           |           |           | C | -1.183551 | -5.001522 | 2.468471  |
|        |           |           |           | C | -0.789533 | -6.269367 | 2.029537  |
|        |           |           |           | C | 0.109427  | -6.386713 | 0.96224   |
|        |           |           |           | H | -1.904602 | -4.871421 | 3.268961  |
|        |           |           |           | H | -1.19089  | -7.162628 | 2.496104  |
|        |           |           |           | H | 0.396846  | -7.369071 | 0.595797  |
|        |           |           |           | N | 0.662121  | -5.34571  | 0.322419  |
|        |           |           |           | C | 3.155598  | -4.54184  | -0.87285  |
|        |           |           |           | C | 2.953333  | -5.688436 | -1.672916 |
|        |           |           |           | C | 3.967554  | -4.620409 | 0.277142  |
|        |           |           |           | C | 3.554428  | -6.894217 | -1.300208 |
|        |           |           |           | C | 4.548264  | -5.84713  | 0.625048  |
|        |           |           |           | C | 4.346188  | -6.980533 | -0.155936 |
|        |           |           |           | H | 3.39367   | -7.776741 | -1.914834 |
|        |           |           |           | H | 5.175411  | -5.903608 | 1.511687  |
|        |           |           |           | H | 4.809089  | -7.924507 | 0.11933   |
|        |           |           |           | C | 4.233676  | -3.404831 | 1.136801  |
|        |           |           |           | H | 4.557791  | -2.549605 | 0.535197  |
|        |           |           |           | H | 3.333086  | -3.090175 | 1.677525  |
|        |           |           |           | H | 5.008852  | -3.617392 | 1.879027  |
|        |           |           |           | C | 2.04852   | -5.646328 | -2.881109 |
|        |           |           |           | H | 1.026969  | -5.390632 | -2.577725 |
|        |           |           |           | H | 2.362147  | -4.894538 | -3.611079 |
|        |           |           |           | H | 2.021315  | -6.618305 | -3.382033 |
|        |           |           |           | C | -3.006021 | 2.608213  | 1.701967  |
|        |           |           |           | C | -3.687067 | 1.907651  | 0.687174  |
|        |           |           |           | C | -5.572903 | -0.307669 | -0.869199 |
|        |           |           |           | C | -6.391043 | 0.444158  | -1.742667 |
|        |           |           |           | C | -6.122105 | -0.858411 | 0.30625   |
|        |           |           |           | C | -7.736857 | 0.638122  | -1.418671 |
| Ir     | -0.037298 | -0.038519 | 0.105657  |   |           |           |           |
| N      | 0.707811  | -2.886641 | 0.309289  |   |           |           |           |
| N      | -0.796516 | -2.553025 | 1.885358  |   |           |           |           |
| N      | 1.897555  | 2.145637  | 0.559841  |   |           |           |           |
| N      | 2.278865  | 0.683512  | 2.166316  |   |           |           |           |
| N      | -2.848506 | 0.853866  | 0.30557   |   |           |           |           |
| N      | -1.773754 | 1.990647  | 1.855631  |   |           |           |           |
| C      | 1.349092  | -1.084589 | -1.090234 |   |           |           |           |
| C      | 2.093733  | -0.561669 | -2.153491 |   |           |           |           |
| H      | 1.913995  | 0.458681  | -2.471499 |   |           |           |           |
| C      | 3.062658  | -1.320703 | -2.810129 |   |           |           |           |
| H      | 3.625053  | -0.894961 | -3.637494 |   |           |           |           |
| C      | 2.628458  | -3.206478 | -1.317235 |   |           |           |           |
| C      | 1.593266  | -2.437258 | -0.739954 |   |           |           |           |
| C      | 0.317018  | -4.150652 | 0.76919   |   |           |           |           |
| C      | -0.61533  | -3.924705 | 1.801705  |   |           |           |           |
| C      | -0.044878 | -1.909997 | 0.936413  |   |           |           |           |
| C      | -1.715586 | -1.922833 | 2.814805  |   |           |           |           |
| H      | -1.448615 | -2.185871 | 3.844178  |   |           |           |           |
| H      | -2.741537 | -2.246125 | 2.61861   |   |           |           |           |
| H      | -1.64849  | -0.845196 | 2.680924  |   |           |           |           |
| C      | 0.194077  | 1.723588  | -1.037164 |   |           |           |           |
| C      | -0.532889 | 2.066635  | -2.182875 |   |           |           |           |
| H      | -1.353842 | 1.431973  | -2.4986   |   |           |           |           |
| C      | -0.202844 | 3.185154  | -2.947779 |   |           |           |           |
| H      | -0.779209 | 3.433189  | -3.835645 |   |           |           |           |
| C      | 1.677993  | 3.672765  | -1.461196 |   |           |           |           |
| C      | 1.257795  | 2.583994  | -0.662942 |   |           |           |           |
| C      | 2.808252  | 2.740788  | 1.442101  |   |           |           |           |
| C      | 3.080974  | 1.780986  | 2.436836  |   |           |           |           |
| C      | 1.511013  | 0.909193  | 1.051259  |   |           |           |           |
| C      | 2.236448  | -0.490164 | 3.019308  |   |           |           |           |
| H      | 2.017335  | -0.198545 | 4.052679  |   |           |           |           |
| H      | 3.196241  | -1.01468  | 2.995348  |   |           |           |           |
| H      | 1.455439  | -1.151981 | 2.655119  |   |           |           |           |
| C      | -1.684046 | -0.709864 | -1.038701 |   |           |           |           |
| C      | -1.652383 | -1.684357 | -2.043819 |   |           |           |           |

|   |           |           |           |   |           |          |          |
|---|-----------|-----------|-----------|---|-----------|----------|----------|
| C | -7.473654 | -0.638553 | 0.603323  | H | -3.107045 | 4.293594 | 3.068422 |
| C | -8.281557 | 0.103513  | -0.251915 | C | -5.425628 | 3.340309 | 0.748657 |
| H | -8.362858 | 1.22049   | -2.090531 | H | -6.388331 | 3.63212  | 0.336407 |
| H | -7.892892 | -1.067519 | 1.51045   | C | -4.853794 | 4.078149 | 1.792479 |
| H | -9.330851 | 0.259624  | -0.015926 | H | -5.378906 | 4.937793 | 2.194885 |
| C | -5.281846 | -1.683359 | 1.254529  | C | 4.523826  | 3.362241 | 3.437749 |
| H | -5.909866 | -2.175673 | 2.002951  | H | 5.229899  | 3.671402 | 4.201019 |
| H | -4.711284 | -2.451463 | 0.722445  | C | 3.971978  | 2.07744  | 3.459668 |
| H | -4.557285 | -1.057654 | 1.789699  | H | 4.219555  | 1.361714 | 4.236817 |
| C | -5.820395 | 1.09452   | -2.980354 |   |           |          |          |
| H | -5.358924 | 0.370307  | -3.657859 |   |           |          |          |
| H | -6.597589 | 1.630872  | -3.532346 |   |           |          |          |
| H | -5.041482 | 1.813559  | -2.702376 |   |           |          |          |
| N | -4.85639  | 2.265119  | 0.185047  |   |           |          |          |
| C | 4.141454  | 4.264252  | 2.437217  |   |           |          |          |
| H | 4.537444  | 5.27668   | 2.432233  |   |           |          |          |
| C | 2.916672  | 4.514454  | -1.328826 |   |           |          |          |
| C | 4.157256  | 3.996663  | -1.756005 |   |           |          |          |
| C | 2.818313  | 5.858939  | -0.908734 |   |           |          |          |
| C | 5.287622  | 4.824209  | -1.727405 |   |           |          |          |
| C | 3.965295  | 6.658026  | -0.902273 |   |           |          |          |
| C | 5.198335  | 6.146722  | -1.304093 |   |           |          |          |
| H | 6.243553  | 4.423199  | -2.055503 |   |           |          |          |
| H | 3.888155  | 7.692029  | -0.574277 |   |           |          |          |
| H | 6.081993  | 6.779456  | -1.296283 |   |           |          |          |
| C | 4.288058  | 2.578513  | -2.263862 |   |           |          |          |
| H | 4.034506  | 1.835425  | -1.5004   |   |           |          |          |
| H | 3.616687  | 2.395155  | -3.109797 |   |           |          |          |
| H | 5.311076  | 2.378441  | -2.594811 |   |           |          |          |
| C | 1.512116  | 6.424576  | -0.403828 |   |           |          |          |
| H | 0.69668   | 6.294257  | -1.120978 |   |           |          |          |
| H | 1.210595  | 5.914014  | 0.518816  |   |           |          |          |
| H | 1.607127  | 7.491772  | -0.18297  |   |           |          |          |
| N | 3.284541  | 3.974118  | 1.447314  |   |           |          |          |
| C | -4.049821 | -1.623403 | -2.267906 |   |           |          |          |
| H | -4.965703 | -2.00525  | -2.709603 |   |           |          |          |
| C | 0.899509  | 3.955897  | -2.599396 |   |           |          |          |
| H | 1.203974  | 4.788299  | -3.227263 |   |           |          |          |
| C | 3.339585  | -2.611443 | -2.375916 |   |           |          |          |
| H | 4.141268  | -3.183035 | -2.834594 |   |           |          |          |
| C | -3.596565 | 3.719556  | 2.288356  |   |           |          |          |

Optimized geometry of triplet ***f*-Ir(dmpmp)<sub>3</sub>**

| Symbol | X         | Y         | Z         |
|--------|-----------|-----------|-----------|
| Ir     | -0.041262 | 0.019438  | 0.076724  |
| N      | 1.453169  | 2.497494  | 0.438779  |
| N      | 2.230699  | 1.094197  | 2.010454  |
| N      | -3.013639 | -0.190277 | 0.532732  |
| N      | -2.299121 | 1.099983  | 2.163581  |
| N      | 1.420332  | -2.527705 | 0.279131  |
| N      | -0.169249 | -2.68416  | 1.792004  |
| C      | -0.293074 | 1.81192   | -1.007309 |
| C      | -1.202591 | 2.078919  | -2.03429  |
| H      | -1.850017 | 1.285316  | -2.392524 |
| C      | -1.286498 | 3.348013  | -2.615246 |
| H      | -1.994945 | 3.535741  | -3.418479 |
| C      | 0.450447  | 4.18348   | -1.115133 |
| C      | 0.549495  | 2.874979  | -0.595639 |
| C      | 2.813831  | 2.707975  | 0.547652  |
| C      | 3.28581   | 1.856714  | 1.58964   |
| C      | 1.057846  | 1.385887  | 1.261164  |
| C      | 2.251786  | 0.219172  | 3.157474  |
| H      | 2.096845  | 0.771085  | 4.095319  |
| H      | 3.210436  | -0.303566 | 3.217391  |
| H      | 1.459484  | -0.523039 | 3.048527  |
| C      | -1.497901 | -1.055192 | -1.060995 |
| C      | -1.196369 | -1.803011 | -2.205637 |
| H      | -0.16265  | -1.934166 | -2.504516 |
| C      | -2.209264 | -2.34984  | -2.993208 |
| H      | -1.960859 | -2.922554 | -3.883209 |
| C      | -3.910021 | -1.381616 | -1.524614 |
| C      | -2.85617  | -0.919782 | -0.702328 |

|   |           |           |           |   |           |           |           |
|---|-----------|-----------|-----------|---|-----------|-----------|-----------|
| C | -4.092018 | -0.020298 | 1.410585  | H | 1.752061  | 5.366764  | -3.43991  |
| C | -3.63769  | 0.844521  | 2.421755  | H | 3.349156  | 6.087253  | -3.189537 |
| C | -1.891324 | 0.432867  | 1.042042  | C | 0.355234  | -3.961108 | 1.640607  |
| C | -1.489008 | 1.949802  | 3.024519  | C | 1.351585  | -3.877476 | 0.648234  |
| H | -1.503251 | 1.565065  | 4.050323  | C | 4.265331  | -3.382997 | -0.829527 |
| H | -1.885639 | 2.969047  | 3.0181    | C | 4.435048  | -4.491888 | -1.688701 |
| H | -0.468355 | 1.945159  | 2.627354  | C | 5.004039  | -3.296279 | 0.367979  |
| C | 1.558191  | -0.56975  | -1.057968 | C | 5.335621  | -5.498559 | -1.329281 |
| C | 2.162213  | 0.182346  | -2.083032 | C | 5.89291   | -4.327911 | 0.698428  |
| H | 1.69952   | 1.111235  | -2.395481 | C | 6.062746  | -5.423082 | -0.142334 |
| C | 3.344835  | -0.234697 | -2.687715 | H | 5.463416  | -6.353575 | -1.988586 |
| H | 3.804661  | 0.364966  | -3.468233 | H | 6.46377   | -4.257923 | 1.621176  |
| C | 3.40235   | -2.229275 | -1.25644  | H | 6.762186  | -6.211806 | 0.121528  |
| C | 2.169767  | -1.815887 | -0.7201   | C | 4.861729  | -2.114365 | 1.300306  |
| C | 0.422652  | -1.814213 | 0.919578  | H | 5.620898  | -2.150515 | 2.086983  |
| C | -1.282904 | -2.376495 | 2.67377   | H | 4.961191  | -1.160419 | 0.772957  |
| H | -1.148514 | -2.90282  | 3.622645  | H | 3.879549  | -2.106648 | 1.787616  |
| H | -2.235023 | -2.678701 | 2.226473  | C | 3.612818  | -4.639042 | -2.94671  |
| H | -1.297456 | -1.305205 | 2.860852  | H | 3.730322  | -3.790131 | -3.626799 |
| C | 4.62786   | 1.921334  | 1.961472  | H | 3.888759  | -5.547637 | -3.489329 |
| C | 5.426526  | 2.818419  | 1.229428  | H | 2.548142  | -4.703349 | -2.694847 |
| C | 4.874603  | 3.56106   | 0.18617   | N | 2.008292  | -4.911258 | 0.152603  |
| H | 5.036857  | 1.316661  | 2.763535  | C | -6.10697  | -0.246322 | 2.392159  |
| H | 6.479596  | 2.929922  | 1.466958  | H | -7.087157 | -0.716282 | 2.377936  |
| H | 5.500017  | 4.236785  | -0.392052 | C | -5.382774 | -1.100425 | -1.411267 |
| N | 3.574241  | 3.514458  | -0.178317 | C | -5.882494 | 0.157709  | -1.807923 |
| C | 1.177304  | 5.391134  | -0.599374 | C | -6.273885 | -2.132681 | -1.043754 |
| C | 2.141251  | 6.040489  | -1.40507  | C | -7.267272 | 0.372183  | -1.80482  |
| C | 0.821302  | 5.942323  | 0.650669  | C | -7.649433 | -1.885004 | -1.062111 |
| C | 2.734577  | 7.219237  | -0.941092 | C | -8.149387 | -0.638509 | -1.435793 |
| C | 1.440821  | 7.121692  | 1.083847  | H | -7.651285 | 1.342223  | -2.110766 |
| C | 2.3929    | 7.760742  | 0.296073  | H | -8.333951 | -2.679839 | -0.775474 |
| H | 3.479337  | 7.713204  | -1.560436 | H | -9.221344 | -0.460125 | -1.447725 |
| H | 1.159579  | 7.544448  | 2.045515  | C | -4.960958 | 1.26844   | -2.258216 |
| H | 2.862604  | 8.678191  | 0.640798  | H | -4.288592 | 1.603108  | -1.46108  |
| C | -0.227835 | 5.297362  | 1.5282    | H | -4.32355  | 0.945543  | -3.088431 |
| H | -1.12815  | 5.044532  | 0.95863   | H | -5.535608 | 2.136885  | -2.591869 |
| H | 0.142047  | 4.366435  | 1.971922  | C | -5.764178 | -3.471221 | -0.56473  |
| H | -0.51427  | 5.96741   | 2.344482  | H | -5.079956 | -3.938529 | -1.278687 |
| C | 2.578906  | 5.461032  | -2.729612 | H | -5.212436 | -3.348245 | 0.375014  |
| H | 2.993156  | 4.460113  | -2.572328 | H | -6.592183 | -4.162247 | -0.382276 |

|   |           |           |           |   |           |           |           |
|---|-----------|-----------|-----------|---|-----------|-----------|-----------|
| N | -5.281275 | -0.599482 | 1.39741   | H | 1.515647  | -1.050033 | -2.597799 |
| C | 3.957376  | -1.407994 | -2.261879 | C | 1.708349  | 0.741663  | -1.138484 |
| H | 4.908636  | -1.71013  | -2.690281 | C | 1.640034  | 1.682831  | -2.175334 |
| C | -3.539214 | -2.11684  | -2.66586  | H | 0.66601   | 2.008463  | -2.527648 |
| H | -4.331576 | -2.480715 | -3.31324  | C | 2.790511  | 2.215315  | -2.758298 |
| C | -0.48203  | 4.383704  | -2.147943 | H | 2.713032  | 2.940315  | -3.565079 |
| H | -0.58644  | 5.38328   | -2.560442 | C | 4.192277  | 0.917904  | -1.230185 |
| C | 0.054356  | -5.190182 | 2.211875  | C | 3.005257  | 0.341946  | -0.723026 |
| H | -0.708959 | -5.304648 | 2.974424  | C | 3.870923  | -1.616686 | 0.765281  |
| C | 1.715798  | -6.09942  | 0.702996  | C | 3.221736  | -2.342838 | 1.783451  |
| H | 2.257074  | -6.950841 | 0.298354  | C | 1.726803  | -0.863239 | 0.936425  |
| C | 0.776139  | -6.284248 | 1.724348  | C | 0.927713  | -2.380096 | 2.780594  |
| H | 0.596948  | -7.279486 | 2.116689  | H | 1.303685  | -2.331345 | 3.807622  |
| C | -5.773211 | 0.656131  | 3.411663  | H | 0.698659  | -3.422422 | 2.535878  |
| H | -6.503419 | 0.896542  | 4.176962  | H | 0.022321  | -1.784341 | 2.686572  |
| C | -4.494753 | 1.218114  | 3.449798  | C | -1.347077 | 0.977676  | -1.153458 |
| H | -4.188311 | 1.894166  | 4.241014  | C | -2.008303 | 0.443535  | -2.266509 |

Optimized geometry of singlet *m*-Ir(dmpmp)<sub>3</sub>

| Symbol | X         | Y         | Z         |   |           |           |           |
|--------|-----------|-----------|-----------|---|-----------|-----------|-----------|
| Ir     | 0.074415  | 0.008613  | 0.032401  | H | -1.751285 | -0.552744 | -2.614577 |
| N      | -1.262955 | -2.601332 | -0.292962 | C | -3.003407 | 1.151915  | -2.93989  |
| N      | 0.315596  | -2.557599 | -1.831538 | H | -3.500344 | 0.717022  | -3.803593 |
| N      | 2.951864  | -0.660631 | 0.317117  | C | -2.772331 | 3.003096  | -1.359938 |
| N      | 1.9288    | -1.850078 | 1.865987  | C | -1.699062 | 2.297483  | -0.772827 |
| N      | -0.876706 | 2.768421  | 0.316892  | C | -0.034321 | 1.838449  | 0.89878   |
| N      | 0.585827  | 2.472103  | 1.940546  | C | 1.492342  | 1.876709  | 2.90517   |
| C      | -1.519698 | -0.773183 | 1.190207  | H | 1.057573  | 1.926881  | 3.90919   |
| C      | -2.174468 | -0.146057 | 2.260602  | H | 2.449148  | 2.406213  | 2.903076  |
| H      | -1.789791 | 0.795719  | 2.6443    | H | 1.654035  | 0.837139  | 2.633896  |
| C      | -3.323881 | -0.684996 | 2.840482  | C | 0.080138  | -4.978847 | -2.583745 |
| H      | -3.809912 | -0.180531 | 3.67221   | C | -0.627049 | -6.131881 | -2.232147 |
| C      | -3.285513 | -2.528652 | 1.234973  | C | -1.543737 | -6.09009  | -1.1732   |
| C      | -2.065601 | -2.007139 | 0.750993  | H | 0.824706  | -4.981125 | -3.372913 |
| C      | -1.194599 | -3.889359 | -0.837994 | H | -0.455447 | -7.064773 | -2.758436 |
| C      | -0.213939 | -3.838467 | -1.847584 | H | -2.07124  | -6.99168  | -0.871754 |
| C      | -0.272365 | -1.81084  | -0.850577 | N | -1.829854 | -4.988079 | -0.465423 |
| C      | 1.375769  | -2.120189 | -2.728276 | C | -4.111196 | -3.6477   | 0.664833  |
| H      | 1.087715  | -2.332813 | -3.762085 | C | -4.25153  | -4.863122 | 1.369846  |
| H      | 2.311487  | -2.641972 | -2.501906 | C | -4.855892 | -3.422279 | -0.512314 |
|        |           |           |           | C | -5.118328 | -5.842244 | 0.876036  |
|        |           |           |           | C | -5.708685 | -4.430574 | -0.981677 |
|        |           |           |           | C | -5.842667 | -5.634207 | -0.296726 |
|        |           |           |           | H | -5.221388 | -6.779506 | 1.417919  |



|   |           |           |           |   |           |           |           |
|---|-----------|-----------|-----------|---|-----------|-----------|-----------|
| H | -6.282485 | -4.256078 | -1.888548 | C | 6.156518  | -0.663819 | -2.770927 |
| H | -6.51452  | -6.403387 | -0.668439 | H | 5.442282  | -1.457896 | -2.524654 |
| C | -4.773908 | -2.110455 | -1.259408 | H | 5.672151  | -0.01217  | -3.503969 |
| H | -4.995117 | -1.261028 | -0.604973 | H | 7.026434  | -1.124936 | -3.247524 |
| H | -3.776359 | -1.926269 | -1.670814 | C | 5.006881  | 2.150422  | 1.317106  |
| H | -5.484587 | -2.092833 | -2.090476 | H | 4.367309  | 2.803374  | 0.715392  |
| C | -3.432167 | -5.148205 | 2.60621   | H | 4.344885  | 1.462318  | 1.856336  |
| H | -2.366339 | -5.1758   | 2.350622  | H | 5.523589  | 2.763128  | 2.061784  |
| H | -3.558554 | -4.382551 | 3.377367  | N | 5.083071  | -1.88526  | 0.308777  |
| H | -3.702417 | -6.115967 | 3.038675  | C | -3.39462  | 2.398652  | -2.468702 |
| C | 0.226139  | 3.810637  | 1.974352  | H | -4.221776 | 2.92494   | -2.935916 |
| C | -0.676031 | 4.019599  | 0.913289  | C | 4.041648  | 1.849263  | -2.275448 |
| C | -3.436526 | 4.261684  | -0.878438 | H | 4.938691  | 2.308824  | -2.68026  |
| C | -3.294734 | 5.466114  | -1.600707 | C | -3.88041  | -1.843226 | 2.311672  |
| C | -4.314868 | 4.194271  | 0.223428  | H | -4.819167 | -2.225498 | 2.701491  |
| C | -4.020456 | 6.59101   | -1.197817 | C | 0.615276  | 4.877807  | 2.772308  |
| C | -5.018532 | 5.344601  | 0.603877  | H | 1.302389  | 4.758711  | 3.603659  |
| C | -4.876104 | 6.537539  | -0.098475 | C | -0.766086 | 6.234715  | 1.320448  |
| H | -3.907287 | 7.519844  | -1.752016 | H | -1.158261 | 7.205145  | 1.026561  |
| H | -5.694594 | 5.293075  | 1.453983  | C | 0.084061  | 6.124302  | 2.427888  |
| H | -5.435507 | 7.419483  | 0.202524  | H | 0.341116  | 7.009382  | 2.999964  |
| C | -4.526741 | 2.904914  | 0.984962  | C | 5.195291  | -3.624422 | 1.99396   |
| H | -5.297985 | 3.02954   | 1.750529  | H | 5.786918  | -4.410475 | 2.450917  |
| H | -4.83583  | 2.09187   | 0.31973   | C | 3.893443  | -3.369023 | 2.435102  |
| H | -3.614564 | 2.561244  | 1.484353  | H | 3.432632  | -3.950747 | 3.226708  |
| C | -2.32394  | 5.574639  | -2.752366 |   |           |           |           |
| H | -2.500344 | 4.814779  | -3.519261 |   |           |           |           |
| H | -2.387004 | 6.558903  | -3.225548 |   |           |           |           |
| H | -1.296771 | 5.435435  | -2.395116 |   |           |           |           |
| N | -1.146579 | 5.201573  | 0.555432  |   |           |           |           |
| C | 5.730141  | -2.878992 | 0.935295  |   |           |           |           |
| H | 6.729198  | -3.09556  | 0.565187  |   |           |           |           |
| C | 5.60068   | 0.754718  | -0.730035 |   |           |           |           |
| C | 6.558629  | 0.075925  | -1.517128 |   |           |           |           |
| C | 5.998458  | 1.396281  | 0.460697  |   |           |           |           |
| C | 7.889706  | 0.040016  | -1.092439 |   |           |           |           |
| C | 7.340538  | 1.33518   | 0.859173  |   |           |           |           |
| C | 8.284948  | 0.662981  | 0.090577  |   |           |           |           |
| H | 8.623635  | -0.486518 | -1.69781  |   |           |           |           |
| H | 7.643039  | 1.83392   | 1.776896  |   |           |           |           |
| H | 9.324525  | 0.630559  | 0.40552   |   |           |           |           |

Optimized geometry of triplet *m*-Ir(dmpmp)<sub>3</sub>

| Symbol | X         | Y         | Z         |
|--------|-----------|-----------|-----------|
| Ir     | 0.277213  | 0.114182  | 0.044188  |
| N      | -1.289878 | -2.342516 | 0.289051  |
| N      | -2.096631 | -1.014845 | 1.853371  |
| N      | -2.344906 | 1.629317  | -0.342159 |
| N      | -2.578343 | -0.042502 | -1.771678 |
| N      | 2.992569  | 1.154288  | -0.269109 |
| N      | 1.837338  | 2.04072   | -1.92172  |
| C      | 0.367213  | -1.53213  | -1.205811 |
| C      | 1.219754  | -1.700899 | -2.308554 |
| H      | 1.76797   | -0.847808 | -2.696868 |
| C      | 1.397795  | -2.952261 | -2.893985 |
| H      | 2.069822  | -3.075549 | -3.739051 |

|   |           |           |           |   |           |           |           |
|---|-----------|-----------|-----------|---|-----------|-----------|-----------|
| C | -0.13131  | -3.958744 | -1.258518 | N | -3.078431 | -4.025885 | 0.304822  |
| C | -0.380346 | -2.66205  | -0.76505  | C | -0.59396  | -5.256436 | -0.66135  |
| C | -2.467636 | -2.942266 | 0.75081   | C | -1.510905 | -6.078149 | -1.353576 |
| C | -2.951794 | -2.105145 | 1.774916  | C | -0.006904 | -5.704493 | 0.541409  |
| C | -1.116411 | -1.111145 | 0.908368  | C | -1.834766 | -7.33075  | -0.823951 |
| C | -2.292077 | 0.078685  | 2.797707  | C | -0.364488 | -6.96207  | 1.045363  |
| H | -2.395781 | -0.332623 | 3.806552  | C | -1.270892 | -7.773903 | 0.370928  |
| H | -3.19068  | 0.64784   | 2.538609  | H | -2.543874 | -7.961287 | -1.354691 |
| H | -1.429049 | 0.73854   | 2.75603   | H | 0.08916   | -7.30744  | 1.970999  |
| C | -0.349925 | 1.997876  | 0.881948  | H | -1.532126 | -8.750416 | 0.769693  |
| C | 0.451972  | 2.79516   | 1.70763   | C | 1.019045  | -4.87564  | 1.283056  |
| H | 1.42671   | 2.437644  | 2.023611  | H | 1.845521  | -4.577567 | 0.629479  |
| C | 0.006124  | 4.043938  | 2.152822  | H | 0.593566  | -3.951075 | 1.688081  |
| H | 0.63109   | 4.641594  | 2.811813  | H | 1.437226  | -5.440961 | 2.120391  |
| C | -2.055381 | 3.794202  | 0.867811  | C | -2.2005   | -5.601782 | -2.609753 |
| C | -1.613903 | 2.503485  | 0.502432  | H | -2.852714 | -4.753188 | -2.372608 |
| C | -3.690548 | 1.282429  | -0.332046 | H | -1.496646 | -5.2668   | -3.376998 |
| C | -3.837542 | 0.249861  | -1.290117 | H | -2.818377 | -6.395036 | -3.040118 |
| C | -1.595763 | 0.762761  | -1.171613 | C | 3.088955  | 2.642737  | -1.944223 |
| C | -2.365729 | -0.906076 | -2.916917 | C | 3.823012  | 2.112646  | -0.865329 |
| H | -2.900085 | -0.516576 | -3.793348 | C | 5.712646  | 0.071809  | 0.927577  |
| H | -2.724525 | -1.920959 | -2.713815 | C | 6.633003  | 0.924851  | 1.574432  |
| H | -1.301627 | -0.952269 | -3.136367 | C | 6.123809  | -0.722909 | -0.163539 |
| C | 1.846827  | -0.185551 | 1.316931  | C | 7.949988  | 0.980209  | 1.10897   |
| C | 1.823005  | -0.955501 | 2.493286  | C | 7.449796  | -0.632811 | -0.607056 |
| H | 0.872762  | -1.32317  | 2.86702   | C | 8.360488  | 0.210628  | 0.021795  |
| C | 2.996148  | -1.277873 | 3.171316  | H | 8.658169  | 1.64012   | 1.604096  |
| H | 2.963956  | -1.874054 | 4.079224  | H | 7.768367  | -1.245061 | -1.447025 |
| C | 4.324307  | -0.102411 | 1.47194   | H | 9.388046  | 0.263022  | -0.327915 |
| C | 3.114595  | 0.30399   | 0.881648  | C | 5.175493  | -1.683172 | -0.847366 |
| C | 1.75069   | 1.174022  | -0.879666 | H | 5.707281  | -2.2925   | -1.583414 |
| C | 0.768641  | 2.351302  | -2.861739 | H | 4.698396  | -2.358837 | -0.12989  |
| H | 1.05312   | 2.030702  | -3.869426 | H | 4.365249  | -1.164858 | -1.37213  |
| H | 0.583435  | 3.429019  | -2.865995 | C | 6.202419  | 1.823526  | 2.709017  |
| H | -0.133696 | 1.825609  | -2.533468 | H | 5.735859  | 1.270146  | 3.529517  |
| C | -4.120036 | -2.445153 | 2.444116  | H | 7.055103  | 2.375096  | 3.114874  |
| C | -4.749652 | -3.618919 | 2.014261  | H | 5.465268  | 2.551905  | 2.351982  |
| C | -4.210232 | -4.35291  | 0.952837  | N | 5.022333  | 2.525367  | -0.494445 |
| H | -4.533332 | -1.830235 | 3.236137  | C | -5.890765 | 1.250161  | 0.180737  |
| H | -5.668641 | -3.95197  | 2.484609  | H | -6.696646 | 1.649434  | 0.79165   |
| H | -4.713994 | -5.247668 | 0.596117  | C | -3.27663  | 4.484843  | 0.333673  |

|   |           |           |           |   |           |           |           |
|---|-----------|-----------|-----------|---|-----------|-----------|-----------|
| C | -4.357025 | 4.79521   | 1.191439  | C | 2.620712  | 3.216401  | 1.556771  |
| C | -3.297864 | 4.923969  | -1.008334 | C | 3.048935  | 1.449693  | 3.14742   |
| C | -5.43911  | 5.525411  | 0.688897  | H | 1.949152  | -0.375266 | 2.881944  |
| C | -4.401858 | 5.647571  | -1.476924 | C | 3.296806  | 2.742038  | 2.681733  |
| C | -5.469703 | 5.948687  | -0.637586 | H | 2.787771  | 4.217501  | 1.17863   |
| H | -6.270526 | 5.757301  | 1.350005  | H | 3.572772  | 1.081777  | 4.026484  |
| H | -4.411472 | 5.985884  | -2.510251 | H | 4.011263  | 3.384072  | 3.189284  |
| H | -6.317864 | 6.515411  | -1.012316 | C | 0.833778  | 3.983932  | -0.869827 |
| C | -4.395062 | 4.309866  | 2.621314  | C | 0.100563  | 1.828057  | -0.766127 |
| H | -4.41109  | 3.214978  | 2.632363  | C | -0.136819 | 3.796069  | -1.876902 |
| H | -3.524713 | 4.632835  | 3.19978   | C | -0.478574 | 4.858599  | -2.701352 |
| H | -5.292599 | 4.673889  | 3.129978  | C | 1.148516  | 6.139111  | -1.43758  |
| C | -2.144562 | 4.652982  | -1.948284 | C | 0.195359  | 6.061656  | -2.460239 |
| H | -1.18698  | 4.930193  | -1.494385 | H | -1.226139 | 4.771543  | -3.483125 |
| H | -2.078956 | 3.591526  | -2.210922 | H | 1.670651  | 7.074808  | -1.253233 |
| H | -2.261187 | 5.221778  | -2.87554  | H | -0.017923 | 6.939337  | -3.060895 |
| N | -4.658193 | 1.759982  | 0.435832  | C | -1.627804 | 0.835232  | 1.273255  |
| C | 4.221524  | -0.879596 | 2.645238  | C | -1.620907 | 1.76866   | 2.319946  |
| H | 5.144439  | -1.197377 | 3.12145   | C | -2.902088 | 0.381861  | 0.874701  |
| C | -1.220778 | 4.53687   | 1.722068  | C | -2.80411  | 2.211261  | 2.922252  |
| H | -1.538293 | 5.534495  | 2.01173   | H | -0.671236 | 2.151917  | 2.680828  |
| C | 0.751557  | -4.061635 | -2.351283 | C | -4.102694 | 0.802974  | 1.450707  |
| H | 0.950584  | -5.051961 | -2.750029 | C | -4.041969 | 1.732246  | 2.490136  |
| C | 3.656147  | 3.622986  | -2.747151 | H | -2.756856 | 2.931614  | 3.735512  |
| H | 3.128678  | 4.055176  | -3.590935 | H | -5.048849 | 0.408475  | 1.101044  |
| C | 5.567754  | 3.476627  | -1.267197 | H | -4.960416 | 2.075131  | 2.958279  |
| H | 6.556677  | 3.814728  | -0.968226 | C | -3.84851  | -1.352754 | -0.775976 |
| C | 4.943115  | 4.035212  | -2.389727 | C | -1.617868 | -0.890045 | -0.701524 |
| H | 5.455354  | 4.798978  | -2.964916 | C | -3.191143 | -2.185429 | -1.706575 |
| C | -6.155946 | 0.289545  | -0.787399 | C | -3.931693 | -3.089043 | -2.455482 |
| H | -7.1749   | -0.05284  | -0.937422 | C | -5.865084 | -2.217104 | -1.278445 |
| C | -5.105657 | -0.25452  | -1.556547 | C | -5.311764 | -3.091805 | -2.221469 |
| H | -5.278782 | -1.030221 | -2.294539 | H | -3.474969 | -3.760659 | -3.17516  |
|   |           |           |           | H | -6.937494 | -2.221309 | -1.099378 |
|   |           |           |           | H | -5.958709 | -3.771436 | -2.765665 |
|   |           |           |           | C | 0.083279  | -1.693117 | 1.438536  |
|   |           |           |           | C | -0.732367 | -2.049394 | 2.522396  |
|   |           |           |           | C | 1.106266  | -2.611204 | 1.12361   |
|   |           |           |           | C | -0.535435 | -3.237514 | 3.235408  |
|   |           |           |           | H | -1.533076 | -1.381143 | 2.824501  |
|   |           |           |           | C | 1.33      | -3.806511 | 1.810314  |

### Optimized geometry of singlet $f\text{-Ir}(\text{pmp})_3$

| Symbol | X         | Y        | Z        |
|--------|-----------|----------|----------|
| Ir     | -0.003151 | 0.015527 | 0.19521  |
| C      | 1.421139  | 1.05274  | 1.361535 |
| C      | 1.706711  | 2.365127 | 0.931909 |
| C      | 2.127896  | 0.622981 | 2.494155 |

|   |           |           |           |   |           |           |           |
|---|-----------|-----------|-----------|---|-----------|-----------|-----------|
| C | 0.4904    | -4.115411 | 2.881416  | C | -1.198501 | 1.890932  | 2.602069  |
| H | -1.186155 | -3.475812 | 4.073446  | C | -3.840796 | 1.481533  | 1.706235  |
| H | 2.139104  | -4.465283 | 1.51973   | C | -2.263713 | 2.509807  | 3.246467  |
| H | 0.643109  | -5.037657 | 3.434957  | H | -0.190249 | 2.050682  | 2.967128  |
| C | 3.086773  | -2.729513 | -0.517208 | C | -3.582337 | 2.305182  | 2.799582  |
| C | 1.589724  | -1.012083 | -0.597974 | H | -4.845902 | 1.311949  | 1.34039   |
| C | 3.494861  | -1.832052 | -1.526762 | H | -2.07855  | 3.149373  | 4.105341  |
| C | 4.648485  | -2.098107 | -2.250599 | H | -4.410626 | 2.79045   | 3.307507  |
| C | 4.82991   | -4.1023   | -0.896418 | C | -4.08338  | -0.413347 | -0.692756 |
| C | 5.32559   | -3.275463 | -1.911787 | C | -1.786915 | -0.53997  | -0.601897 |
| H | 5.01327   | -1.435063 | -3.028408 | C | -3.648751 | -1.29244  | -1.693134 |
| H | 5.357752  | -5.016469 | -0.636004 | C | -4.595577 | -1.920261 | -2.532036 |
| H | 6.23714   | -3.55227  | -2.430498 | C | -6.260425 | -0.673316 | -1.249223 |
| C | 2.652317  | 0.345851  | -2.430301 | C | -5.940327 | -1.565179 | -2.268837 |
| H | 2.924631  | 0.022318  | -3.439443 | H | -4.322756 | -2.622022 | -3.311726 |
| H | 3.404378  | 1.051988  | -2.063942 | H | -7.30003  | -0.415316 | -1.063075 |
| H | 1.683793  | 0.839814  | -2.458662 | H | -6.739878 | -1.995187 | -2.864296 |
| C | -0.814547 | -2.544946 | -2.415036 | C | -0.221555 | -1.803335 | 1.457639  |
| H | -0.57712  | -3.520342 | -1.978459 | C | -1.08887  | -2.109861 | 2.51992   |
| H | 0.081094  | -1.927657 | -2.415835 | C | 0.622999  | -2.850157 | 1.039694  |
| H | -1.159858 | -2.685041 | -3.443568 | C | -1.086497 | -3.365521 | 3.134555  |
| C | -1.589221 | 1.898356  | -2.627548 | H | -1.760218 | -1.341662 | 2.888256  |
| H | -1.554677 | 0.816134  | -2.523603 | C | 0.64332   | -4.117096 | 1.62647   |
| H | -1.416589 | 2.170273  | -3.673459 | C | -0.225226 | -4.365854 | 2.689803  |
| H | -2.577661 | 2.255957  | -2.321509 | H | -1.755657 | -3.560396 | 3.968542  |
| N | -0.549273 | 2.472457  | -1.791826 | H | 1.317483  | -4.881869 | 1.262003  |
| N | 0.950048  | 2.76268   | -0.215388 | H | -0.223608 | -5.341296 | 3.167274  |
| N | 1.483634  | 5.116137  | -0.633944 | C | 2.471389  | -3.245021 | -0.725225 |
| N | -2.856326 | -0.57838  | -0.184842 | C | 1.390916  | -1.259745 | -0.592539 |
| N | -1.840888 | -1.865581 | -1.643669 | C | 3.002433  | -2.391307 | -1.694902 |
| N | -5.155382 | -1.341291 | -0.548016 | C | 4.031245  | -2.84141  | -2.527734 |
| N | 3.715689  | -3.850716 | -0.189498 | C | 3.823348  | -4.926725 | -1.310327 |
| N | 1.923191  | -2.195009 | 0.024909  | C | 4.433404  | -4.150063 | -2.313288 |
| N | 2.555037  | -0.809763 | -1.555709 | H | 4.48903   | -2.217074 | -3.287316 |

Optimized geometry of triplet ***f*-Ir(pmp)<sub>3</sub>**

| Symbol | X         | Y         | Z        |   |          |           |           |
|--------|-----------|-----------|----------|---|----------|-----------|-----------|
| Ir     | -0.008323 | -0.016026 | 0.405547 | H | 4.14277  | -5.952372 | -1.148142 |
| C      | -1.401516 | 1.029472  | 1.499977 | H | 5.224307 | -4.583815 | -2.915758 |
| C      | -2.758111 | 0.864347  | 1.075465 | C | 1.618243 | 0.671273  | 1.517606  |
|        |           |           |          | C | 2.282974 | 0.058641  | 2.595781  |
|        |           |           |          | C | 2.121606 | 1.94284   | 1.107866  |
|        |           |           |          | C | 3.348614 | 0.683058  | 3.248247  |
|        |           |           |          | H | 1.938555 | -0.907918 | 2.948107  |

|   |           |           |           |   |           |           |           |
|---|-----------|-----------|-----------|---|-----------|-----------|-----------|
| C | 3.197592  | 2.581444  | 1.746421  | N | 2.772776  | -0.617162 | -1.429316 |
| C | 3.80299   | 1.941345  | 2.822388  | N | 0.363078  | 2.693013  | -0.404077 |
| H | 3.823613  | 0.195527  | 4.095871  | N | 1.15904   | 2.275857  | 1.599365  |
| H | 3.534183  | 3.54851   | 1.395134  | N | -2.85774  | -1.12982  | -0.091503 |
| H | 4.632187  | 2.423205  | 3.332658  | N | -2.929094 | 0.759155  | 1.021701  |
| C | 1.641042  | 3.722078  | -0.673295 | C | 0.387624  | -1.330462 | 1.680074  |
| C | 0.411705  | 1.791946  | -0.582322 | C | -0.399856 | -1.643614 | 2.801098  |
| C | 0.662884  | 3.760666  | -1.689264 | H | -1.416781 | -1.261342 | 2.862365  |
| C | 0.576737  | 4.889863  | -2.531768 | C | 0.076457  | -2.436666 | 3.851583  |
| C | 2.457612  | 5.750588  | -1.239794 | H | -0.568995 | -2.654887 | 4.699401  |
| C | 1.523499  | 5.896119  | -2.265791 | C | 1.685393  | -1.88456  | 1.692683  |
| H | -0.165569 | 4.985333  | -3.3157   | C | 3.745509  | -1.883808 | 0.152789  |
| H | 3.181065  | 6.539714  | -1.051047 | C | 3.946447  | -1.285509 | -1.107671 |
| H | 1.530903  | 6.804024  | -2.861071 | C | 1.848567  | -0.764667 | -0.429357 |
| C | -1.193284 | 2.267617  | -2.451495 | C | 2.594074  | 0.116389  | -2.674857 |
| H | -0.966709 | 2.534103  | -3.488317 | H | 2.848434  | -0.530909 | -3.519622 |
| H | -2.082932 | 2.820645  | -2.130163 | H | 3.241569  | 0.999337  | -2.693073 |
| H | -1.397225 | 1.198766  | -2.383207 | H | 1.554462  | 0.423645  | -2.755893 |
| C | 2.619316  | -0.008533 | -2.397791 | C | -0.51655  | 0.970657  | -1.789555 |
| H | 3.54016   | 0.461563  | -2.036891 | C | -1.108554 | 0.595136  | -3.007224 |
| H | 1.810646  | 0.704811  | -2.336645 | H | -1.355623 | -0.450336 | -3.17141  |
| H | 2.75075   | -0.306328 | -3.436477 | C | -1.38221  | 1.523453  | -4.018642 |
| C | -1.451978 | -2.212186 | -2.459105 | H | -1.836769 | 1.189757  | -4.948673 |
| H | -0.421238 | -1.889026 | -2.435767 | C | -0.23558  | 2.347756  | -1.659272 |
| H | -1.812244 | -2.1655   | -3.485926 | C | 0.887882  | 3.893722  | 0.063999  |
| H | -1.511101 | -3.24895  | -2.106811 | C | 1.400185  | 3.619629  | 1.349083  |
| N | -2.257159 | -1.339934 | -1.616253 | C | 0.524497  | 1.689219  | 0.531253  |
| N | -2.924277 | 0.02918   | -0.047082 | C | 1.561686  | 1.60793   | 2.829379  |
| N | -5.346179 | -0.069598 | -0.425983 | H | 1.150939  | 2.140074  | 3.69362   |
| N | 1.476232  | -2.507351 | -0.069856 | H | 2.653291  | 1.588847  | 2.911636  |
| N | 2.305705  | -1.188069 | -1.584868 | H | 1.181521  | 0.588973  | 2.812181  |
| N | 2.84353   | -4.491803 | -0.505492 | C | -0.811096 | -1.972398 | -0.928924 |
| N | 2.544424  | 4.66491   | -0.416384 | C | -0.125014 | -2.973979 | -1.6328   |
| N | 1.464269  | 2.500536  | -0.013122 | H | 0.950208  | -2.894378 | -1.771872 |
| N | -0.053248 | 2.576343  | -1.607951 | C | -0.778281 | -4.08962  | -2.168288 |
|   |           |           |           | H | -0.205813 | -4.84232  | -2.705324 |
|   |           |           |           | C | -2.200766 | -2.176888 | -0.805982 |
|   |           |           |           | C | -2.077026 | -0.098827 | 0.375024  |
|   |           |           |           | C | -2.559083 | 2.009192  | 1.662583  |
|   |           |           |           | H | -3.157594 | 2.142031  | 2.567768  |
|   |           |           |           | H | -2.723603 | 2.860201  | 0.993531  |

Optimized geometry of singlet *m*-Ir(pmp)<sub>3</sub>

| Symbol | X         | Y         | Z         |
|--------|-----------|-----------|-----------|
| Ir     | -0.088011 | -0.204887 | -0.055476 |
| N      | 2.451999  | -1.545133 | 0.534506  |

|   |           |           |           |   |           |           |           |
|---|-----------|-----------|-----------|---|-----------|-----------|-----------|
| H | -1.508119 | 1.962875  | 1.936206  | N | -2.62143  | -1.346441 | -0.559803 |
| C | 5.164911  | -1.445758 | -1.75322  | N | -2.876191 | -0.50913  | 1.449952  |
| C | 6.118528  | -2.212852 | -1.075588 | N | -0.055663 | 2.680342  | 0.500203  |
| C | 5.816504  | -2.762735 | 0.17708   | N | -0.992066 | 2.443895  | -1.465363 |
| H | 5.370302  | -1.005401 | -2.723359 | N | 2.746972  | -1.380342 | 0.014423  |
| H | 7.095592  | -2.385727 | -1.513893 | N | 2.942927  | 0.538103  | -1.024087 |
| H | 6.560861  | -3.357327 | 0.70111   | C | -0.572187 | -1.09756  | -1.744209 |
| N | 4.641179  | -2.611249 | 0.808491  | C | 0.175263  | -1.302284 | -2.918335 |
| C | -4.236085 | 0.294141  | 0.944815  | H | 1.195329  | -0.931084 | -2.969526 |
| C | -4.192665 | -0.924198 | 0.235414  | C | -0.356177 | -1.976776 | -4.018522 |
| N | -5.240882 | -1.688657 | -0.041336 | H | 0.251797  | -2.135036 | -4.905219 |
| C | 1.503231  | 6.056618  | 0.174293  | C | -1.906018 | -1.589205 | -1.756716 |
| H | 1.539198  | 7.031164  | -0.306525 | C | -3.954595 | -1.572712 | -0.214873 |
| N | 0.922308  | 5.076636  | -0.537252 | C | -4.109538 | -1.032782 | 1.075351  |
| C | -2.156319 | -4.243071 | -2.014957 | C | -1.953516 | -0.694037 | 0.460756  |
| H | -2.66521  | -5.109378 | -2.427731 | C | -2.643686 | 0.152208  | 2.725646  |
| C | -1.077657 | 2.874119  | -3.839791 | H | -2.923313 | -0.516115 | 3.546249  |
| H | -1.29012  | 3.596482  | -4.622958 | H | -3.243412 | 1.065656  | 2.791308  |
| C | 1.372222  | -2.953452 | 3.813545  | H | -1.588316 | 0.404279  | 2.803104  |
| H | 1.744236  | -3.571458 | 4.625702  | C | 0.604938  | 0.831324  | 1.831679  |
| C | -5.45579  | 0.773846  | 1.400927  | C | 1.15045   | 0.338029  | 3.027356  |
| H | -5.548181 | 1.709692  | 1.942285  | H | 1.266587  | -0.73266  | 3.162788  |
| C | -6.416508 | -1.219313 | 0.406471  | C | 1.534375  | 1.195325  | 4.066058  |
| H | -7.28557  | -1.834207 | 0.185633  | H | 1.943889  | 0.777634  | 4.982569  |
| C | -6.571292 | -0.02118  | 1.114878  | C | 0.491913  | 2.230254  | 1.731409  |
| H | -7.560397 | 0.28638   | 1.436854  | C | -0.363198 | 3.967467  | 0.061623  |
| C | 2.04381   | 5.890409  | 1.455734  | C | -0.966268 | 3.806177  | -1.197973 |
| H | 2.495915  | 6.737844  | 1.959814  | C | -0.428579 | 1.730181  | -0.429945 |
| C | 1.999717  | 4.637789  | 2.077834  | C | -1.612067 | 1.918163  | -2.670516 |
| H | 2.412138  | 4.476841  | 3.068532  | H | -1.177422 | 2.40166   | -3.551684 |
| C | -2.887219 | -3.27578  | -1.323691 | H | -2.689376 | 2.116377  | -2.659213 |
| H | -3.957912 | -3.366957 | -1.188825 | H | -1.441035 | 0.848074  | -2.72937  |
| C | -0.49787  | 3.303181  | -2.644465 | C | 0.655647  | -2.057539 | 0.911548  |
| H | -0.252428 | 4.34543   | -2.481195 | C | -0.09329  | -3.0159   | 1.632088  |
| C | 2.196321  | -2.679535 | 2.720219  | H | -1.147033 | -2.833107 | 1.817378  |
| H | 3.20379   | -3.073038 | 2.662526  | C | 0.479375  | -4.190633 | 2.108946  |
|   |           |           |           | H | -0.127131 | -4.911711 | 2.649757  |
|   |           |           |           | C | 2.038921  | -2.364969 | 0.729225  |
|   |           |           |           | C | 2.035857  | -0.267912 | -0.396917 |
|   |           |           |           | C | 2.666549  | 1.8406    | -1.607927 |
|   |           |           |           | H | 3.260241  | 1.959331  | -2.5183   |

Optimized geometry of triplet *m*-Ir(**pmp**)<sub>3</sub>

| Symbol | X        | Y        | Z        |
|--------|----------|----------|----------|
| Ir     | 0.030158 | -0.30384 | 0.087857 |

|   |           |           |           |
|---|-----------|-----------|-----------|
| H | 2.913647  | 2.646287  | -0.909473 |
| H | 1.608643  | 1.893925  | -1.856604 |
| C | -5.353592 | -1.096956 | 1.702298  |
| C | -6.36862  | -1.719082 | 0.95433   |
| C | -6.106539 | -2.221244 | -0.320492 |
| H | -5.532258 | -0.69397  | 2.692686  |
| H | -7.368592 | -1.810919 | 1.365562  |
| H | -6.900761 | -2.697685 | -0.889461 |
| N | -4.901318 | -2.164128 | -0.935247 |
| C | 4.212367  | -0.034159 | -0.996645 |
| C | 4.092355  | -1.271513 | -0.337389 |
| N | 5.072687  | -2.13788  | -0.110771 |
| C | -0.58967  | 6.208233  | -0.002563 |
| H | -0.433966 | 7.16645   | 0.486996  |
| N | -0.154739 | 5.124398  | 0.687364  |
| C | 1.841087  | -4.447678 | 1.892338  |
| H | 2.288016  | -5.363182 | 2.269225  |
| C | 1.394388  | 2.576119  | 3.927796  |
| H | 1.693202  | 3.242953  | 4.731635  |
| C | -1.671627 | -2.452819 | -3.980237 |
| H | -2.088896 | -2.971243 | -4.838731 |
| C | 5.460573  | 0.373854  | -1.464889 |
| H | 5.619713  | 1.323128  | -1.963482 |
| C | 6.28056   | -1.736984 | -0.573252 |
| H | 7.102321  | -2.426352 | -0.397678 |
| C | 6.512281  | -0.530702 | -1.233374 |
| H | 7.517485  | -0.291125 | -1.564378 |
| C | -1.203465 | 6.159208  | -1.252163 |
| H | -1.521927 | 7.083489  | -1.723546 |
| C | -1.415344 | 4.926591  | -1.900633 |
| H | -1.897785 | 4.85887   | -2.868782 |
| C | 2.635486  | -3.534742 | 1.1967    |
| H | 3.688736  | -3.714467 | 1.019567  |
| C | 0.869092  | 3.110194  | 2.750442  |
| H | 0.74974   | 4.177697  | 2.613024  |
| C | -2.461316 | -2.2653   | -2.843729 |
| H | -3.481677 | -2.625829 | -2.793838 |
